# Supplementary material for: A New SNP-Based Genotyping Method for C. psittaci: Application to Field Samples for Quick Identification
Source: MDPI journal article supplement (doi:10.3390/microorganisms9030625), 2021-03-17
Supplement: s1 [file s1]

| U/Pathogen | Strain/phenotype             | Strain/phenotype | ID             | Host    | Country | amp & Gentamic | MLST | Reference            |
|------------|------------------------------|------------------|----------------|---------|---------|----------------|------|----------------------|
| E. coli    | reference strains            | OE8-00405        | pathogenic     | USA     | A       | -              | -    | Sachdev et al., 2008 |
|            |                              | U01              | pathogenic     | France  | A       | -              | -    | Sachdev et al., 2008 |
|            | Eid strains with typing data | 84-0461          | pathogenic     | France  | A       | -              | -    | unpublished data     |
|            |                              | 84-0462          | pathogenic     | France  | A       | -              | -    | unpublished data     |
|            | Eid strains with typing data | 84-0462          | unknown        | France  | A       | -              | -    | Sachdev et al., 2009 |
|            |                              | 84-0462          | unknown        | France  | A       | -              | -    | Sachdev et al., 2009 |
|            | Eid strains with typing data | 85-1171          | parrot         | France  | A       | -              | -    | Sachdev et al., 2009 |
|            |                              | 85-1208          | parrot         | France  | A       | -              | -    | Sachdev et al., 2009 |
|            | Eid strains with typing data | 86-0191          | pathogenic     | France  | A       | -              | -    | Sachdev et al., 2009 |
|            |                              | 86-0203          | unknown        | France  | A       | -              | -    | Sachdev et al., 2009 |
|            | Eid strains with typing data | 86-1455          | parrot         | France  | A       | -              | -    | Sachdev et al., 2009 |
|            |                              | 86-1338          | parrot         | France  | A       | -              | -    | Sachdev et al., 2009 |
|            | Eid strains with typing data | 87-1361          | unknown        | France  | A       | -              | -    | Sachdev et al., 2009 |
|            |                              | 88-2014          | parrot         | France  | A       | -              | -    | Sachdev et al., 2009 |
|            | Eid strains with typing data | 88-2558          | parrot         | France  | A       | -              | -    | Sachdev et al., 2009 |
|            |                              | 88-2621          | parrot         | France  | A       | -              | -    | Sachdev et al., 2009 |
|            | Eid strains with typing data | 88-2705          | parrot         | France  | A       | -              | -    | Sachdev et al., 2009 |
|            |                              | 88-2705          | parrot         | France  | A       | -              | -    | Sachdev et al., 2009 |
|            | Eid strains with typing data | 90-0475          | parrot         | France  | A       | -              | -    | Sachdev et al., 2009 |
|            |                              | 90-0485          | parrot         | France  | A       | -              | -    | Sachdev et al., 2009 |
|            | Eid strains with typing data | 90-1164          | parrot         | France  | A       | -              | -    | Sachdev et al., 2009 |
|            |                              | 90-12017         | parrot         | France  | A       | -              | -    | Sachdev et al., 2009 |
|            | Eid strains with typing data | 90-0802          | pathogenic     | France  | A       | -              | -    | unpublished data     |
|            |                              | 91-14273         | pathogenic     | France  | A       | -              | -    | unpublished data     |
|            | Eid strains with typing data | 91-1589          | pathogenic     | France  | A       | -              | -    | unpublished data     |
|            |                              | 91-0047          | parrot         | France  | A       | -              | -    | Sachdev et al., 2009 |
|            | Eid strains with typing data | 91-1334          | parrot         | France  | A       | -              | -    | Sachdev et al., 2009 |
|            |                              | 91-0075          | pathogenic     | France  | A       | -              | -    | unpublished data     |
|            | Eid strains with typing data | 91-0475          | parrot         | France  | A       | -              | -    | Sachdev et al., 2009 |
|            |                              | 96-1627          | parrot         | France  | A       | -              | -    | Sachdev et al., 2009 |
|            | Eid strains with typing data | 99-0332          | parrot         | France  | A       | -              | -    | Sachdev et al., 2009 |
|            |                              | 99-0923          | parrot         | France  | A       | -              | -    | Sachdev et al., 2009 |
|            | Eid strains with typing data | 99-0157          | parrot         | France  | A       | -              | -    | Sachdev et al., 2009 |
|            |                              | 99-0157          | parrot         | France  | A       | -              | -    | Sachdev et al., 2009 |
|            | Eid strains with typing data | 00-0016          | pathogenic     | France  | A       | -              | -    | unpublished data     |
|            |                              | 00-1276          | pathogenic     | France  | A       | -              | -    | unpublished data     |
|            | Eid strains with typing data | 00-1268          | pathogenic     | France  | A       | -              | -    | unpublished data     |
|            |                              | 00-1750          | pathogenic     | France  | A       | -              | -    | unpublished data     |
|            | Eid strains with typing data | 05-2949          | burger         | France  | A       | -              | -    | Sachdev et al., 2009 |
|            |                              | 05-4028          | parrot         | France  | A       | -              | -    | Sachdev et al., 2009 |
|            | Eid strains with typing data | 09-0373          | pathogenic     | France  | A       | -              | -    | unpublished data     |
|            |                              | 09-0824          | pathogenic     | France  | A       | -              | -    | unpublished data     |
|            | Eid strains with typing data | CJ98             | rabbit         | Germany | A       | -              | -    | this study           |
|            |                              | 010131           | swine          | Germany | A       | -              | -    | this study           |
|            | Eid strains with typing data | 030029           | pathogenic     | France  | A       | -              | -    | this study           |
|            |                              | 030035           | cattle         | Germany | A       | -              | -    | this study           |
|            | Eid strains with typing data | 040043           | laboratory rat | France  | A       | -              | -    | this study           |
|            |                              | 040046           | rat            | Germany | A       | -              | -    | this study           |
|            | Eid strains with typing data | 86-1274          | pathogenic     | France  | A       | -              | -    | unpublished data     |
|            |                              | 86-1274          | pathogenic     | France  | A       | -              | -    |                      |

Supplementary Data 1. PCR-HRM clustering of reference strains, field strains and clinical samples from human and animal origin. Available genotype and/or MLST results are indicated.

| Strain                                 | Accession number |
|----------------------------------------|------------------|
| <i>Chlamydia psittaci</i> 01DC11       | GCA_000415525.1  |
| <i>Chlamydia psittaci</i> 01DC12       | GCA_000317995.1  |
| <i>Chlamydia psittaci</i> 02DC14       | GCA_000417565.1  |
| <i>Chlamydia psittaci</i> 02DC15       | NC_019391.1      |
| <i>Chlamydia psittaci</i> 02DC16       | GCA_000415565.2  |
| <i>Chlamydia psittaci</i> 02DC18       | GCA_000415585.1  |
| <i>Chlamydia psittaci</i> 02DC21       | GCA_000415605.1  |
| <i>Chlamydia psittaci</i> 02DC22       | GCA_000415625.1  |
| <i>Chlamydia psittaci</i> 02DC23       | GCA_000415645.1  |
| <i>Chlamydia psittaci</i> 02DC24       | GCA_000417585.1  |
| <i>Chlamydia psittaci</i> 03DC29       | GCA_000415665.1  |
| <i>Chlamydia psittaci</i> 03DC35       | GCA_000415825.1  |
| <i>Chlamydia psittaci</i> 04DC42       | GCA_000415685.2  |
| <i>Chlamydia psittaci</i> 06-1683      | GCA_000415845.1  |
| <i>Chlamydia psittaci</i> 08-2626 L3   | GCA_000417825.1  |
| <i>Chlamydia psittaci</i> 08DC60       | NC_017290.1      |
| <i>Chlamydia psittaci</i> 09DC77       | GCA_000415725.1  |
| <i>Chlamydia psittaci</i> 09DC78       | GCA_000415745.1  |
| <i>Chlamydia psittaci</i> 09DC79       | GCA_000417605.1  |
| <i>Chlamydia psittaci</i> 09DC80       | GCA_000415765.1  |
| <i>chlamydia psittaci</i> 6BC          | NC_017287.1      |
| <i>Chlamydia psittaci</i> 84/55        | CP003790.1       |
| <i>Chlamydia psittaci</i> 84-8471/1    | GCA_000417845.2  |
| <i>Chlamydia psittaci</i> 99DC5        | GCA_000415785.1  |
| <i>Chlamydia psittaci</i> AMK          | CP047319         |
| <i>Chlamydia psittaci</i> C1/97        | GCA_000417655.1  |
| <i>Chlamydia psittaci</i> C19/98       | NC_017291.1      |
| <i>Chlamydia psittaci</i> C6/98        | GCA_000417675.1  |
| <i>Chlamydia psittaci</i> Cal10        | GCA_000204175.2  |
| <i>Chlamydia psittaci</i> CB3          | GCA_000687415.1  |
| <i>Chlamydia psittaci</i> CB7          | GCA_000687395.1  |
| <i>Chlamydia psittaci</i> CP3          | CP003797.1       |
| <i>Chlamydia psittaci</i> CR009        | GCA_001714575.1  |
| <i>Chlamydia psittaci</i> DD34         | GCA_001401465.1  |
| <i>Chlamydia psittaci</i> Fa An        | GCA_001714595.1  |
| <i>Chlamydia psittaci</i> Fr Da        | GCA_001714565.1  |
| <i>Chlamydia psittaci</i> Ful 127      | NZ_CP033059.1    |
| <i>Chlamydia psittaci</i> GR9          | NC_018620.1      |
| <i>Chlamydia psittaci</i> HJ           | GCA_000786005.2  |
| <i>Chlamydia psittaci</i> Ho Re lower  | GCA_001735985.1  |
| <i>Chlamydia psittaci</i> Ho Re upper  | GCA_001736055.1  |
| <i>Chlamydia psittaci</i> Horse pl     | CP025423         |
| <i>Chlamydia psittaci</i> M56          | NC_018623.1      |
| <i>Chlamydia psittaci</i> Mat116       | CP002744.1       |
| <i>Chlamydia psittaci</i> MN           | NC_018627.1      |
| <i>Chlamydia psittaci</i> NJ1          | NC_018626.1      |
| <i>Chlamydia psittaci</i> Po An        | GCA_001736045.1  |
| <i>Chlamydia psittaci</i> RD1          | FQ482149.1       |
| <i>Chlamydia psittaci</i> Rostinovo-70 | CP041038         |
| <i>Chlamydia psittaci</i> str. Frances | GCA_001401485.1  |
| <i>Chlamydia psittaci</i> UGA          | GCA_001563055.1  |
| <i>Chlamydia psittaci</i> VS225        | CP003793.1       |
| <i>Chlamydia psittaci</i> WC           | NC_018624.1      |
| <i>Chlamydia psittaci</i> WS/RT/E30    | NC_018622.1      |
| <i>Chlamydia psittaci</i> Zo Pa        | GCA_001714585.1  |

Supplementary Data 2. NCBI accession numbers of the 55 *C. psittaci* strains used in this study.

| SNP No. | Associated Group   | SNP for each group    |                 |                    |                   |               |                   |                   |                 | Allele of the respective subtype | Tm values (°C) | Allele of the other subtypes | Tm values (°C) |
|---------|--------------------|-----------------------|-----------------|--------------------|-------------------|---------------|-------------------|-------------------|-----------------|----------------------------------|----------------|------------------------------|----------------|
|         |                    | Group I (Psittacin e) | Group II (Duck) | Group III (Pigeon) | Group IV (Turkey) | Group V (M56) | Group VI (Mat116) | Group VII (VS225) | Group VIII (WC) |                                  |                |                              |                |
| 1       | Group I_Psittacine | T                     | C               | C                  | C                 | C             | C                 | C                 | C               | T                                | 76,36 ± 0,01   | C                            | 76,65 ± 0,02   |
| 2       | Group II_Duck      | T                     | C               | T                  | T                 | T             | T                 | T                 | T               | C                                | 76,30 ± 0,07   | T                            | 75,79 ± 0,09   |
| 3       | Group III_Pigeon   | A                     | A               | G                  | A                 | A             | A                 | A                 | A               | G                                | 76,11 ± 0,03   | A                            | 75,50 ± 0,04   |
| 4       | Group IV_Turkey    | C                     | C               | C                  | T                 | C             | C                 | C                 | C               | T                                | 75,19 ± 0,09   | C                            | 75,82 ± 0,11   |
| 5       | Group V_M56        | C                     | C               | C                  | C                 | T             | C                 | C                 | C               | T                                | 74,83 ± 0,12   | C                            | 75,29 ± 0,12   |
| 6       | Group VI_Mat116    | T                     | T               | T                  | T                 | T             | C                 | T                 | T               | C                                | 76,16 ± 0,13   | T                            | 75,58 ± 0,09   |
| 7       | Group VII_VS225    | A                     | A               | A                  | A                 | A             | A                 | G                 | A               | G                                | 76,298 ± 0,10  | A                            | 75,358 ± 0,09  |
| 8       | Group VIII_WC      | G                     | G               | G                  | G                 | G             | G                 | G                 | A               | A                                | 76,29 ± 0,07   | G                            | 77,12 ± 0,07   |

Supplementary Data 3. Melting temperature (Tm) values for each SNP. Values were determined for the respective controls tested 6 times.

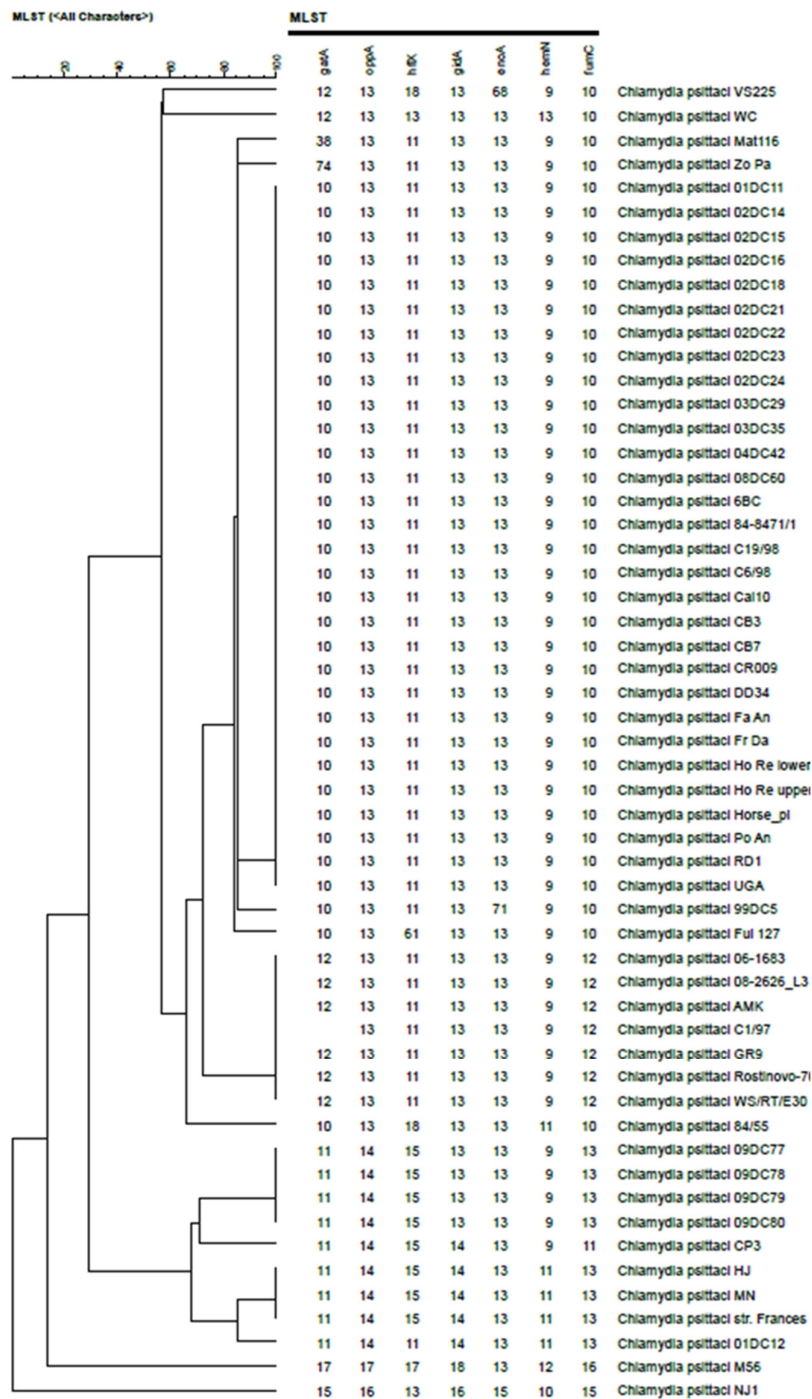

Supplementary Data 4. MLST-based tree determined from ST of the 55 *C. psittaci* strains used for the SNP determination. The tree was built using BioNumerics software with the parameter “categorical values” to calculate the similarity matrix and UPGMA to reconstruct the tree.
